# Supplementary material for: Meta-analyses and Forest plots using a microsoft excel spreadsheet: step-by-step guide focusing on descriptive data analysis
Source: Springer Nature journal article supplement (doi:10.1186/1756-0500-5-52), 2012-01-20
Supplement: 13104_2011_1382_MOESM3_ESM.PDF [file 13104_2011_1382_MOESM3_ESM.PDF]

| Model | Study name  | Calculations (Random) |                |              |               |                |            |            |            |            |            |           |            |            |            |
|-------|-------------|-----------------------|----------------|--------------|---------------|----------------|------------|------------|------------|------------|------------|-----------|------------|------------|------------|
|       |             | Point                 | Study Variance | Tau^2 Within | Tau^2 Between | Total Variance | IV-Weight  | W          | T*W        | T^2*W      | W^2        | W^3       | C          | Q          | Q df       |
|       | 1,00000000  | 0,20179820            | 0,00010079     | 0,00009807   | 0,00000000    | 0,00019887     | 5028,22508 | 5028,22508 | 1014,68677 | 204,761964 | 25283047,5 | 127128853 | 39167,2695 | 9,03274464 | 9,00000000 |
|       | 2,00000000  | 0,16430590            | 0,00046545     | 0,00009807   | 0,00000000    | 0,00056353     | 1774,51317 | 1774,51317 | 291,562985 | 47,9055186 | 3148897,02 | 558775927 | 39167,2695 | 9,03274464 | 9,00000000 |
|       | 3,00000000  | 0,19809320            | 0,00020984     | 0,00009807   | 0,00000000    | 0,00030792     | 3247,55961 | 3247,55961 | 643,319476 | 127,437213 | 10546643,4 | 342508533 | 39167,2695 | 9,03274464 | 9,00000000 |
|       | 4,00000000  | 0,18297870            | 0,00012977     | 0,00009807   | 0,00000000    | 0,00022785     | 4388,82997 | 4388,82997 | 803,062403 | 146,943314 | 19261828,5 | 845368904 | 39167,2695 | 9,03274464 | 9,00000000 |
|       | 5,00000000  | 0,21445550            | 0,00010197     | 0,00009807   | 0,00000000    | 0,00020005     | 4998,62490 | 4998,62490 | 1071,98260 | 229,892565 | 24986250,9 | 124896896 | 39167,2695 | 9,03274464 | 9,00000000 |
|       | 6,00000000  | 0,17768600            | 0,00007342     | 0,00009807   | 0,00000000    | 0,00017150     | 5830,80182 | 5830,80182 | 1036,05185 | 184,091909 | 33998249,8 | 198237057 | 39167,2695 | 9,03274464 | 9,00000000 |
|       | 7,00000000  | 0,21580650            | 0,00006961     | 0,00009807   | 0,00000000    | 0,00016769     | 5963,24142 | 5963,24142 | 1286,90626 | 277,722736 | 35560248,3 | 212054345 | 39167,2695 | 9,03274464 | 9,00000000 |
|       | 8,00000000  | 0,20717130            | 0,00082538     | 0,00009807   | 0,00000000    | 0,00092346     | 1082,88077 | 1082,88077 | 224,341817 | 46,4771859 | 1172630,76 | 126981931 | 39167,2695 | 9,03274464 | 9,00000000 |
|       | 9,00000000  | 0,19704750            | 0,00002529     | 0,00009807   | 0,00000000    | 0,00012337     | 8105,43802 | 8105,43802 | 1597,15629 | 314,715655 | 65698125,6 | 532512085 | 39167,2695 | 9,03274464 | 9,00000000 |
|       | 10,00000000 | 0,18916800            | 0,00014848     | 0,00009807   | 0,00000000    | 0,00024656     | 4055,76599 | 4055,76599 | 767,221141 | 145,133688 | 16449237,7 | 667142592 | 39167,2695 | 9,03274464 | 9,00000000 |
|       |             | 1,94851080            | 0,00215004     | 0,00098079   | 0,00000000    | 0,00313083     | 44475,8808 | 44475,8808 | 8736,29161 | 1725,08175 | 236105159, | 138718882 | 39167,2695 | 9,03274464 | 9,00000000 |

| Model | Study name  | Calculations (Random) |            |            |               |                  |            |                    |  |
|-------|-------------|-----------------------|------------|------------|---------------|------------------|------------|--------------------|--|
|       |             | I^2                   | B          | K          | Summary Point | Summary Variance | Group T^2  | Group T^2 Variance |  |
|       | 1,00000000  | 0,36251049            | 9,06563041 | 10,0000000 | 0,19642762    | 0,00002248       | 0,00009807 | 0,00000001         |  |
|       | 2,00000000  | 0,36251049            | 9,06563041 | 10,0000000 | 0,19642762    | 0,00002248       | 0,00009807 | 0,00000001         |  |
|       | 3,00000000  | 0,36251049            | 9,06563041 | 10,0000000 | 0,19642762    | 0,00002248       | 0,00009807 | 0,00000001         |  |
|       | 4,00000000  | 0,36251049            | 9,06563041 | 10,0000000 | 0,19642762    | 0,00002248       | 0,00009807 | 0,00000001         |  |
|       | 5,00000000  | 0,36251049            | 9,06563041 | 10,0000000 | 0,19642762    | 0,00002248       | 0,00009807 | 0,00000001         |  |
|       | 6,00000000  | 0,36251049            | 9,06563041 | 10,0000000 | 0,19642762    | 0,00002248       | 0,00009807 | 0,00000001         |  |
|       | 7,00000000  | 0,36251049            | 9,06563041 | 10,0000000 | 0,19642762    | 0,00002248       | 0,00009807 | 0,00000001         |  |
|       | 8,00000000  | 0,36251049            | 9,06563041 | 10,0000000 | 0,19642762    | 0,00002248       | 0,00009807 | 0,00000001         |  |
|       | 9,00000000  | 0,36251049            | 9,06563041 | 10,0000000 | 0,19642762    | 0,00002248       | 0,00009807 | 0,00000001         |  |
|       | 10,00000000 | 0,36251049            | 9,06563041 | 10,0000000 | 0,19642762    | 0,00002248       | 0,00009807 | 0,00000001         |  |
|       |             | 0,36251049            | 9,06563041 | 10,0000000 | 0,19642762    | 0,00002248       | 0,00009807 | 0,00000001         |  |
